# Supplementary material for: Augmentation Therapies as Treatments for Coexisting Somatic Problems in Schizophrenia—A Systematic Review
Source: MDPI journal article supplement (doi:10.3390/jcm12124012), 2023-06-12
Supplement: s1 [file s1]

**Table S1.** Risk of bias– evaluation of articles according to method applied by Wiebe A., et al., 2022 [21].

| Study               | Study population | Drug and dose   | Study quality |               |                     |           |              |                       |                  |                      |           |
|---------------------|------------------|-----------------|---------------|---------------|---------------------|-----------|--------------|-----------------------|------------------|----------------------|-----------|
| Authors             | N                | mg/d            | control       | randomization | pre-post comparison | follow-up | registration | experimenter-blinding | analyst-blinding | participant-blinding | overall % |
| Laan [22]           | 70               | Aspirin 1000    | +             | +             | +                   | +         | +            | +                     | +                | +                    | 0         |
| Sommer [23]         | 61               | Simvastatin 40  | +             | +             | +                   | -         | +            | +                     | +                | +                    | 12.5      |
| Shen [24]           | 339*             |                 |               |               |                     |           |              |                       |                  |                      |           |
| Vincenzi [25]       | 24               | Pravastatin 40  | +             | +             | +                   | -         | +            | -                     | -                | -                    | 50        |
| Ghanizadeh [26]     | 36               | Lovastatin 20   | +             | +             | +                   | -         | +            | +                     | +                | +                    | 12.5      |
| Tajik-Esmaeeli [27] | 33               | Simvastatin 40  | +             | +             | +                   | ?         | +            | +                     | +                | +                    | 12.5      |
| Chaudhry [28]       | 108              | Simvastatin 40  | +             | +             | +                   | -         | +            | +                     | +                | -                    | 25        |
| Sayyah [29]         | 40               | Atorvastatin 20 | +             | +             | +                   | -         | -            | +                     | -                | -                    | 50        |
| Deakin              | 98               | Simvastatin 40  | +             | +             | +                   | -         | +            | -                     | ?                | -                    | 50        |

|                   |     |                             |   |   |   |   |     |   |   |   |   |      |
|-------------------|-----|-----------------------------|---|---|---|---|-----|---|---|---|---|------|
| [30]              |     |                             |   |   |   |   |     |   |   |   |   |      |
| Berk [31]         | 40  | N-acetylcysteine 1g/b.i.d.  | + | + | + | + | +   | + | + | + | + | 0    |
| Farokhnia [32]    | 42  | N-acetylcysteine 2g         | + | + | + | ? | +   | + | + | + | + | 12.5 |
| Sepehrmanesh [33] | 42  | N-acetylcysteine 1200 mg    | + | + | + | ? | +   | + | + | + | + | 12.5 |
| Iranpour [34]     | 40  | Pioglitazone 30 mg/d        | + | + | + | - | +   | + | + | + | + | 12.5 |
| Cakici [35]*      | 253 |                             |   |   |   |   |     |   |   |   |   |      |
| Kulkarni [36]     | 36  | Estrogens 100 mdg (patch)   | + | + | + | - | N/A | + | + | + | + | 25   |
| Kulkarni [37]     | 56  | Estradiol 100µg transdermal | + | + | + | - | +   | + | + | + | + | 25   |
| Kulkarni [38]     | 53  | Estradiol 2 mg, Orally      | + | + | + | - | -   | + | + | + | + | 25   |
| Akhondzadeh [39]  | 32  |                             | + | + | + | - | N/A | + | + | + | + | 25   |

[illegible]

|                    |     |                      |   |   |   |   |   |   |   |   |      |
|--------------------|-----|----------------------|---|---|---|---|---|---|---|---|------|
| Lucena [48]        | 10  | Memantine<br>20 mg/d | + | + | + | - | + | + | + | + | 12.5 |
| Lieberman<br>[49]  | 70  | Memantine<br>20 mg/d | + | + | + | - | + | + | + | + | 12.5 |
| Lee [50]           | 26  | Memantine<br>20 mg/d | + | + | + | - | + | + | + | + | 12.5 |
| Rezaei et<br>[51]  | 40  | Memantine<br>20 mg/d | + | + | + | - | + | + | + | + | 12.5 |
| Omranifard<br>[52] | 32  | Memantine<br>20 mg/d | + | + | + | - | + | + | + | + | 12.5 |
| Fakhri<br>[53]     | 30  | Memantine<br>20 mg/d | + | + | + | - | + | + | + | + | 12.5 |
| Veerman<br>[54] ** | 26  | Memantine<br>20 mg/d | + | + | + | - | + | + | + | + | 12.5 |
| Mazinani<br>[55]   | 23  | Memantine<br>20 mg/d | + | + | + | + | + | + | + | + | 0    |
| Zheng<br>[56]*     | 184 |                      |   |   |   |   |   |   |   |   |      |
|                    | 30  | Ondansetron          | + | + | + | - | + | + | + | + | 12.5 |

|                  |    |                      |   |   |   |   |   |   |   |   |   |      |
|------------------|----|----------------------|---|---|---|---|---|---|---|---|---|------|
| Akhondzadeh [57] |    | 8 mg/d               |   |   |   |   |   |   |   |   |   |      |
| Chaudhry [28]    | 36 | Ondansetron 8 mg/d   | + | + | + | - | + | + | + | + |   | 12.5 |
| Kulkarni [58]    | 42 | Ondansetron 8 mg/d   | + | + | + | - | + | + | + | + |   | 12.5 |
| Samadi [59]      | 18 | Ondansetron 4-8 mg/d | + | + | + | - | + | + | + | + |   | 12.5 |
| Zhang [60]       | 58 | Ondansetron 8 mg/d   | + | + | + | - | + | + | + | + |   | 12.5 |
| Fan [61]         | 61 | Telmisartan 80 mg/d  | + | + | + | + | + | + | + | + | + | 0    |

\*- meta-analysis, which includes RCT. Each RCT is evaluated separately.

\*\* - crossover study

Based on the Yes/No- criteria, a risk of bias score was evaluated by calculating the percentage of unfulfilled criteria. 0% RoB indicates a high study quality and a 100% RoB a low study quality.
